# Supplementary material
Source: PubMed Central journal article supplement (PMC4546525)
Supplement: NIHMS706013-supplement.pdf [file NIHMS706013-supplement.pdf]

## Supplemental materials

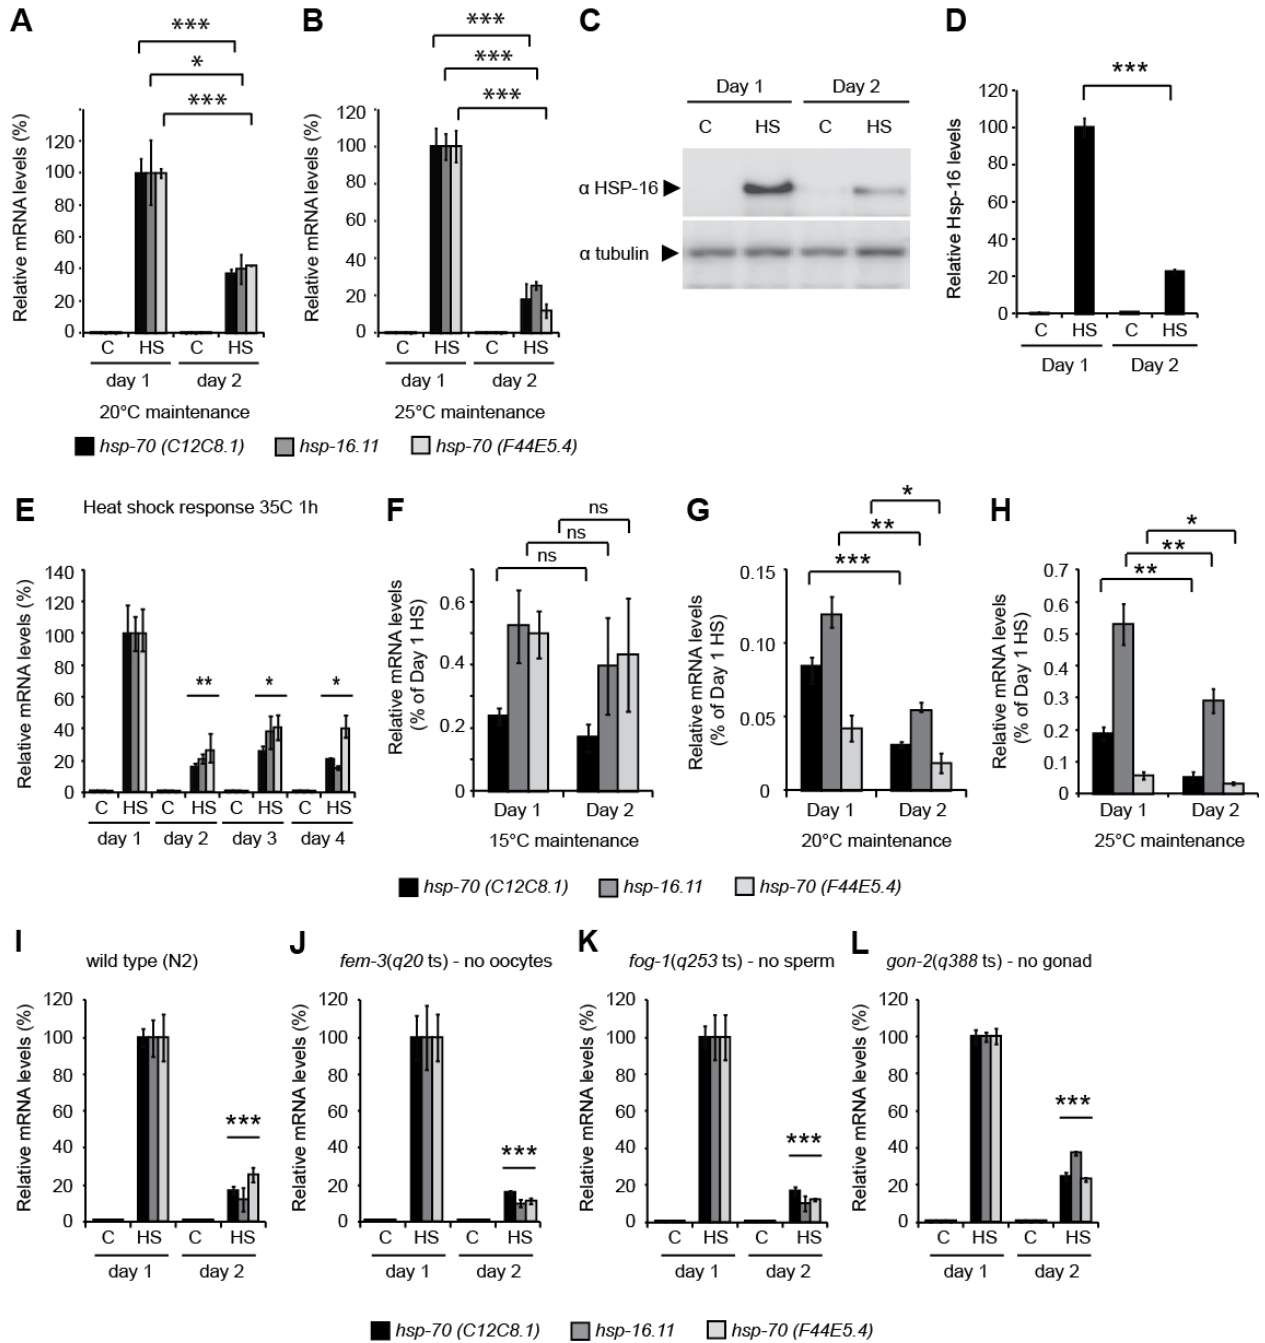

**Figure S1, related to figure 1. Collapse of the HSR is independent of maintenance temperature and is not due to increased embryo mass.**

*C. elegans* were maintained at (A) 20°C or (B) 25°C and exposed to control conditions (c) or heat shock (HS) at 33°C for 30 min at day 1 (4h post L4) or day 2 (28h post L4) of adulthood. Expression of *hsp-70* (*C12C8.1* and *F44E5.4*) and *hsp-16.11* was calculated relative to *cdc-42* and *rpb-2*. (C) Representative western blot of HSP-16 and tubulin 24 hours after exposure to control or heat shock conditions at day 1 or day 2 of adulthood. (D) Quantification of HSP-16 protein levels relative to tubulin at day 1 or day 2 of adulthood (n=4 per group). (E) Heat shock response gene expression relative to *rpb-2* and *cdc-42* in adult animals subjected to control (c) conditions or heat shock (HS) at 35°C for 1 hour. (F - H) Basal expression of heat shock genes at day 1 or day 2 of adulthood after maintenance at (F) 15°C, (G) 20°C or (H) 25°C. Values are plotted relative to levels after heat shock (33°C, 30 min) on day 1 of adulthood (Figure 1A, S1A and B respectively for comparison). (I - L) Stress gene expression in (I) wild type (N2) or temperature sensitive mutants of (J) *fem-3* (*q20ts gf*), (K) *fog-1* (*q253ts*) or (L) *gon-2* (*q388ts*) maintained at the restrictive temperature (25°C) and subjected to control (c) conditions or heat shock (HS) at 33°C for 30 min at day 1 or day 2 of adulthood. Values plotted are the mean of 4 biological replicates and error bars represent SEM. Statistical significance was calculated using Students *t*-test except in panel C where one-way ANOVA with Tukey post analysis comparison was used. \*  $p < 0.05$ , \*\*  $p < 0.01$  \*\*\*  $p < 0.001$ , not significant (ns)  $p > 0.05$ .

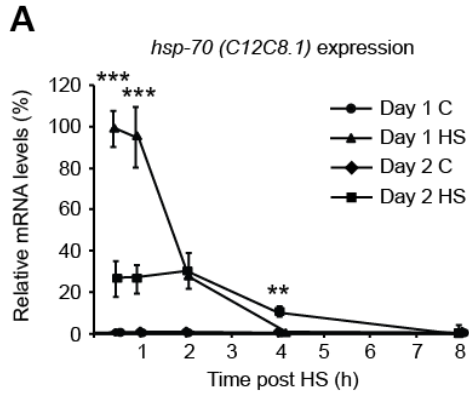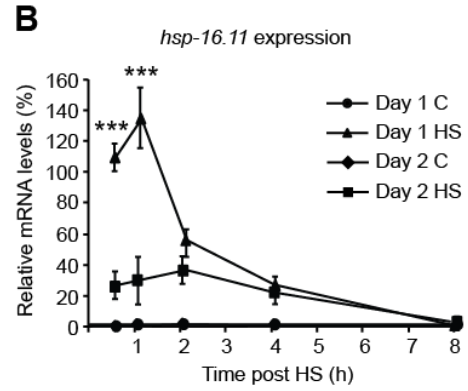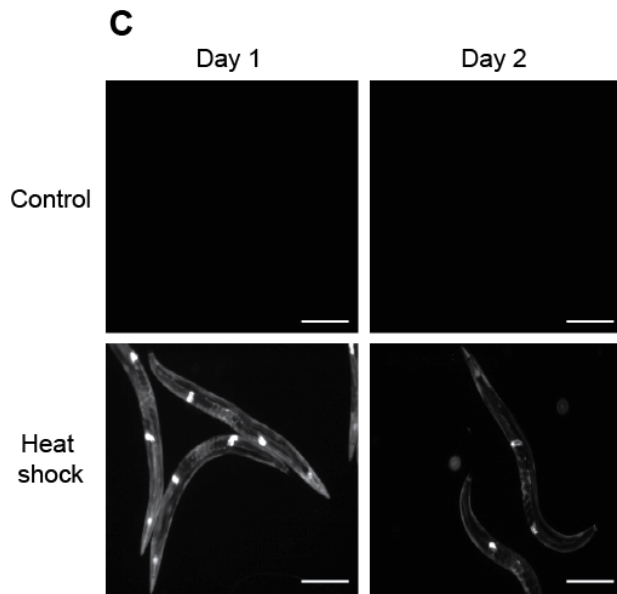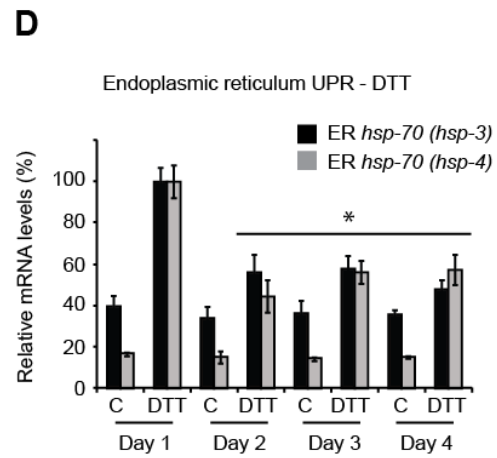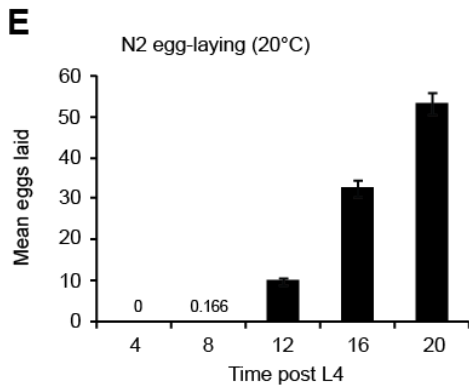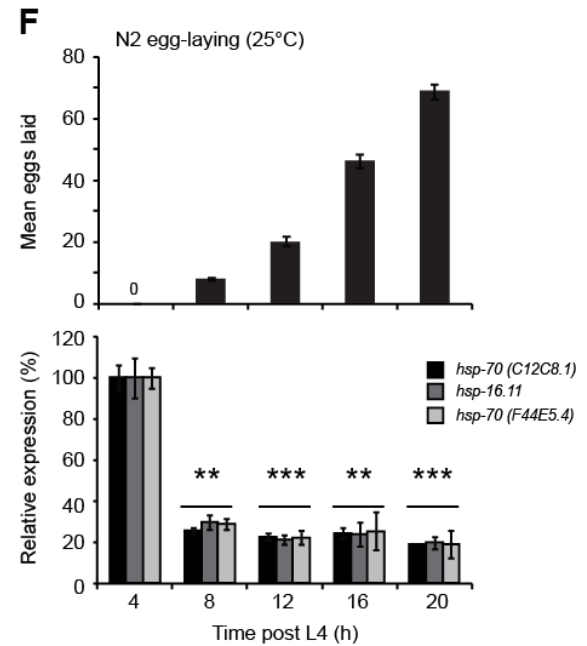

**Figure S2, related to figure 2. Repression of heat shock gene induction is altered throughout the population and across the soma in early adulthood.**

Expression of (A) *hsp-70* (*C12C8.1*) and (B) *hsp-16.11* after 0.5, 1, 2, 4 or 8 hours recovery at 20°C following heat shock (HS) at 33°C for 30 min at day 1 (4h post L4) or day 2 (28h post L4) of adulthood. Expression at each time point was normalized to *rpb-2* and *cdc-42* and the values plotted are the mean of 4 biological replicates. (C) *C. elegans* expressing mCherry under the control of the *hsp-70* (*C12C8.1*) promoter were heat shocked at 33°C for 30 min and allowed to recover at 20°C for 8 hours. Animals were imaged using identical exposure times and alterations to brightness and contrast were applied linearly across all images. Images are representative of greater than 30 worms. Scale bar = 250 μM. (D) Expression of canonical UPR<sup>ER</sup> genes relative to *rpb-2* and *cdc-42* following control (c) or DTT treatment (3 mM for 7 hours) at different days of adulthood. Time course of egg-laying in N2 worms at (E) 20°C and (F) 25°C (n=30). Eggs detectable 8 hours post L4 in (E) correspond to one worm within the population laying eggs early. All worms were laying eggs 12 and 8 hours post L4 when maintained at 20°C or 25°C respectively. (F) Expression of HSR genes in N2 adults following 30 min HS at 33°C. Times post L4 correspond with time points for egg-laying experiments. Values plotted are the mean of 4 biological replicates and error bars represent SEM. Statistical significance was calculated by two-way ANOVA with Bonferroni post analysis comparison (A and B) or one-way ANOVA with Tukey post analysis comparison (D and F) (*p*-value represents the largest value compared to day 1 DTT or HS treatment groups). Values are the mean of 4 biological replicates and error bars denote SEM \* *p* < 0.05, \*\* *p* < 0.01, \*\*\* *p* < 0.001.

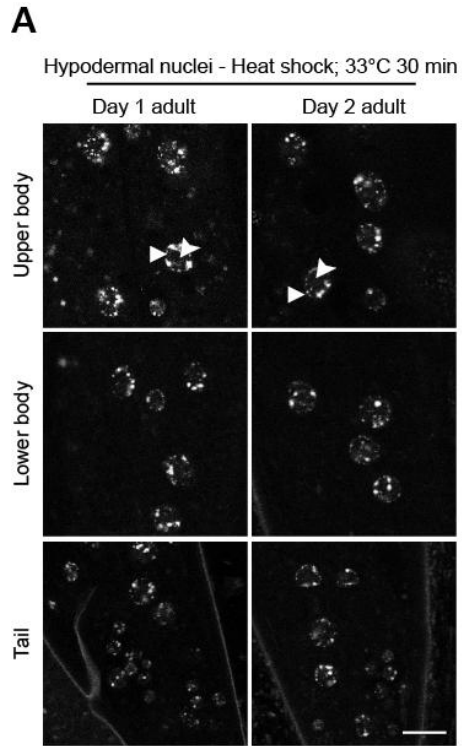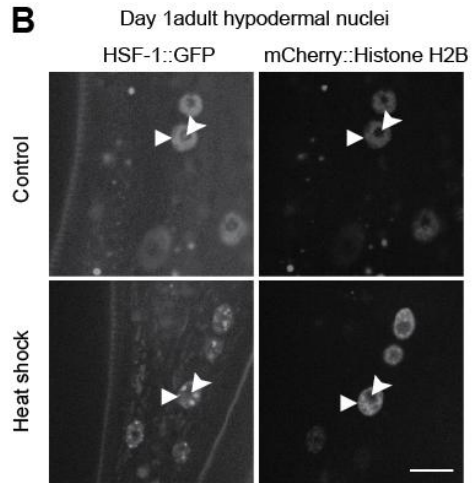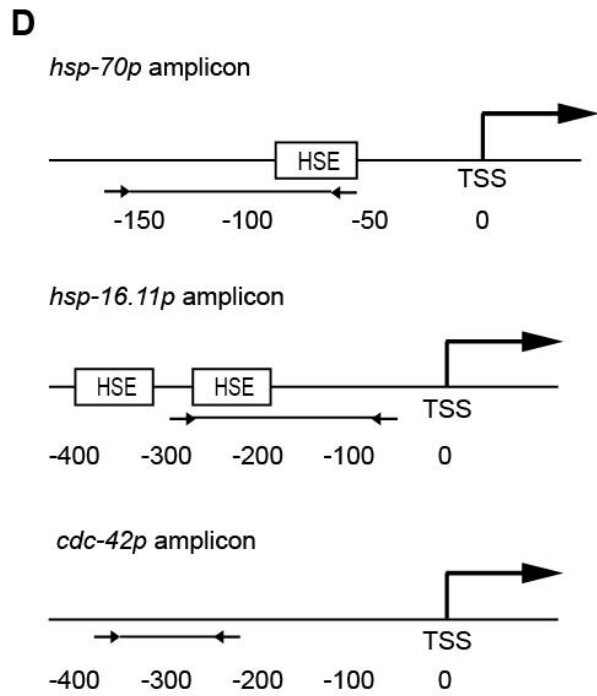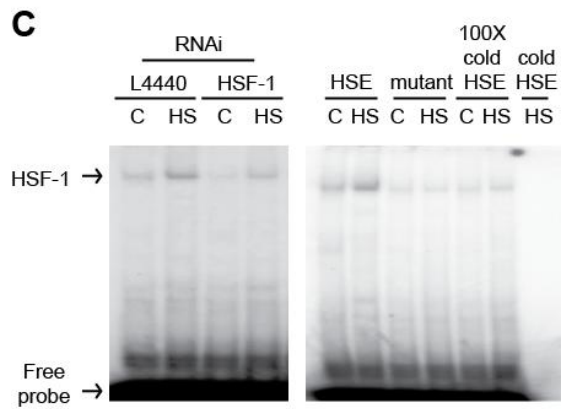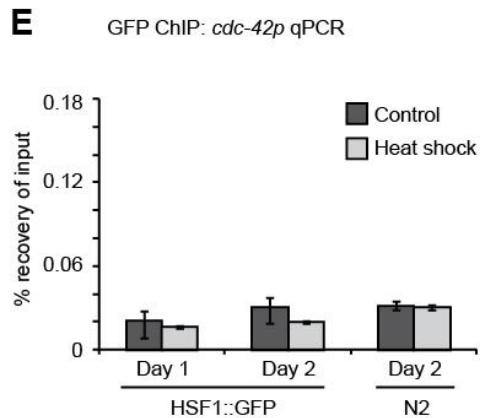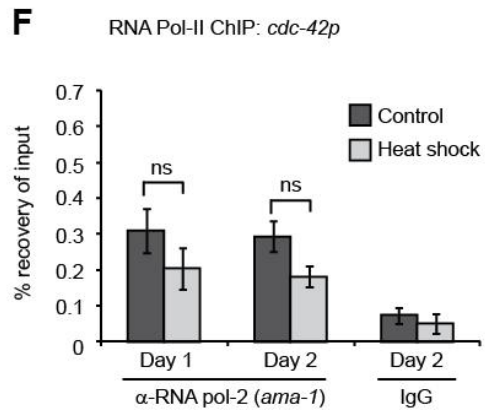

**Figure S3, related to figure 3. HSF-1 forms nuclear foci following heat shock, complexes with a heat shock element containing DNA probe *ex vivo* and does not bind the *cdc-42* promoter.**

(A) *C. elegans* expressing a single copy of HSF-1 C-terminally tagged with GFP (AM1060) were exposed to heat shock at 33°C for 30 min and then imaged within 20 min post heat shock at day 1 or day 2 of adulthood. (B) Confirmation of the nuclear localization of HSF-1::GFP in animals also expressing the nuclear marker mCherry::H2B. Triangles and arrow heads mark nuclei and nucleoli of select hypodermal cells. All images are representative of at least 4 animals. Scale bar = 10 μM. (C) Nuclear extracts from control (c) or heat shocked (HS) worms were incubated with radio-labelled intact heat shock element (HSE) or mutant HSE DNA probe or with an 100-fold excess of unlabelled HSE containing probe. Gel shifts were also performed using nuclear extracts from animals maintained on control (L4440) or HSF-1 RNAi. (D) Schematic of regions amplified in ChIP-qPCR assays relative to heat shock elements (HSE) and the transcription start site (TSS) as determined by modENCODE. ChIP using (E) anti-GFP or (F) anti-*ama-1* (Pol-II) antibody was performed and the levels of recovered *cdc-42* promoter were determined by quantitative PCR. Signal from wild type (N2) animals represents background for GFP pulldowns. IgG antibody was used to determine levels of non-specific signal in *ama-1* pulldowns. Values plotted are the mean from at least 3 biological replicates. Error bars represent SEM. Statistical significance was calculated by two-way ANOVA with Bonferroni post analysis comparison. Not significant (ns)  $p > 0.05$ .

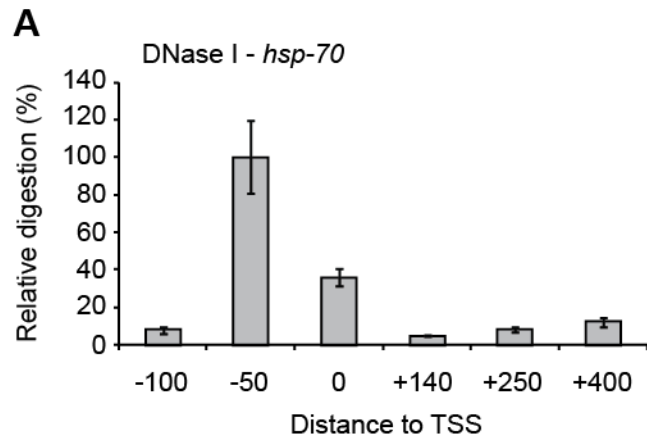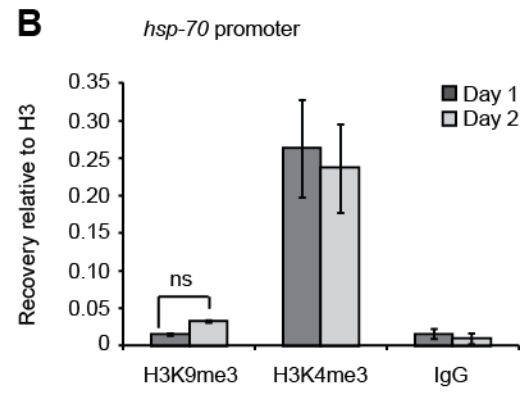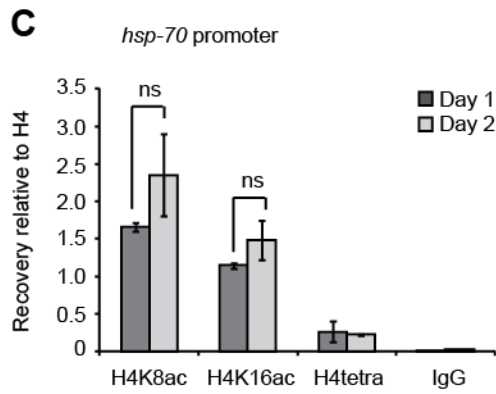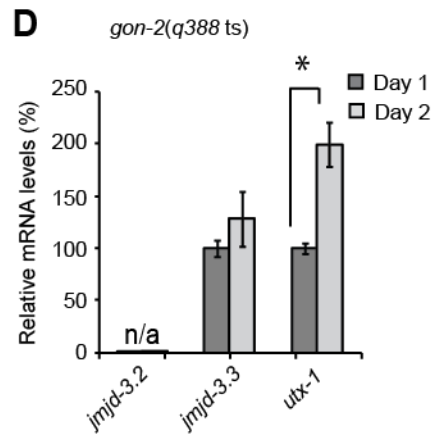

**Figure S4, related to figure 4. Optimization of DNase I treatment and chromatin immunoprecipitation of histone marks in gonad-less animals during early adulthood.**

(A) Chromatin isolated from *gon-2* (*q388ts*) mutant animals was subjected to DNase I digestion or mock treatment and relative accessibility of genomic regions spanning the *hsp-70* promoter and gene body was determined by quantitative PCR. Levels of DNase I digestion are plotted relative to that observed for the promoter region containing the heat shock element (HSE) (TSS - 50bp). Higher values indicate regions of greater accessibility. (B and C) ChIP with antibodies specific for (B) histone H3, H3K9me3, H3K4me3 or (C) histone H4, H4K8ac, H4K16ac, H4 tetra acetylation, and IgG was performed on chromatin extracted from *gon-2*(*q388ts*) mutants at day 1 or day 2 of adulthood. Levels of *hsp-70* promoter recovered with each antibody were plotted relative to (B) total H3 or (C) total H4. (D) Expression of H3K27me3 demethylases in *gon-2* worms at day 1 and day 2 of adulthood. Values plotted are the mean of 3 biological replicates except panel D which are the means of 4 replicates. Error bars represent SEM and statistical significance was calculated using Student's *t*-test. \*  $p < 0.05$ ; not significant (ns)  $p > 0.05$ . TSS denotes transcription start site. *hsp-70* refers to *C12C8.1*. n/a denotes no signal obtained.



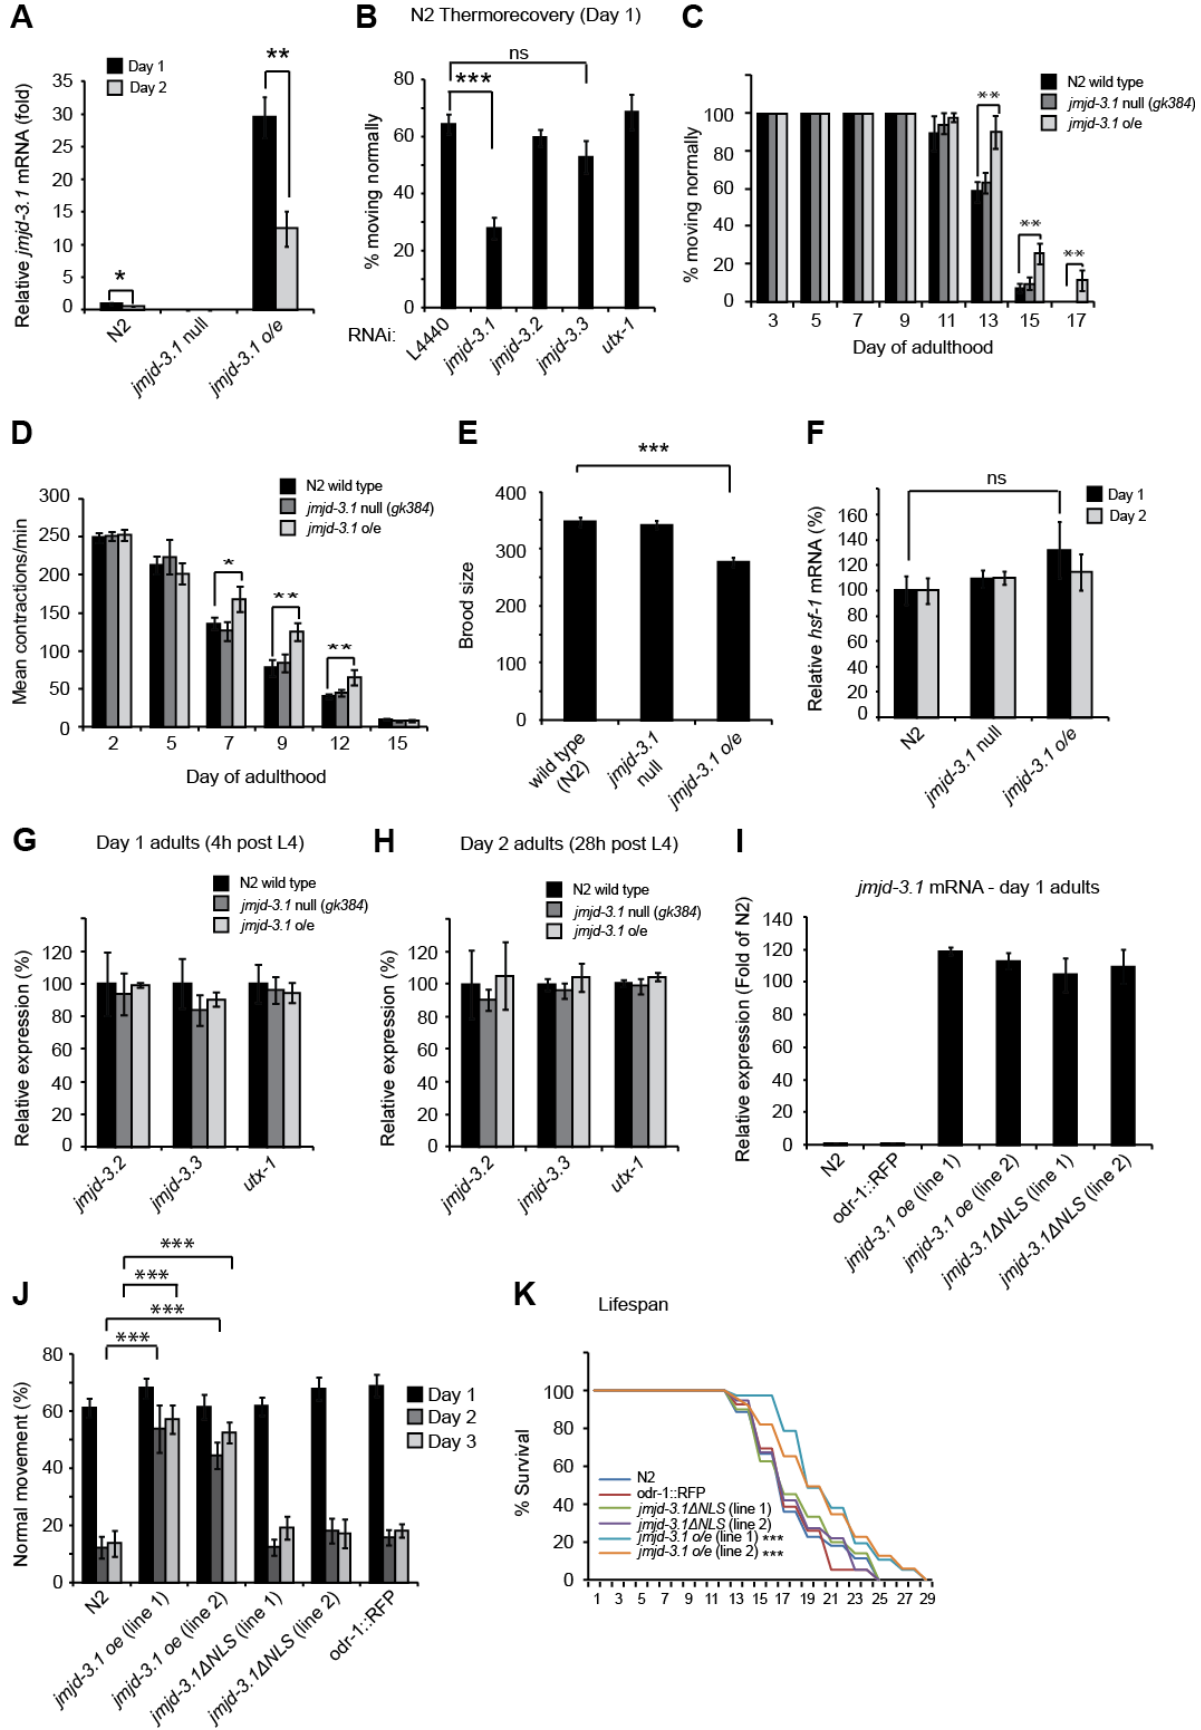

**Figure S5, related to figure 5. *Jmjd-3.1* over expression suppresses age-related decline in pharangeal pumping and motility without effects on *hsf-1* or H3K27me3 demethylase expression.** (A) Levels of *jmjd-3.1* in N2 wild type, *jmjd-3.1(gk384)* null or *jmjd-3.1* over-expressing (o/e) animals. (B) Thermorecovery of wild type (WT) N2 worms at day 1 (4 hours post L4) of adulthood following maintenance on control (L4440) or H3K27me3 specific RNAi. (C) Motility defects in worms during aging (n = 30 per group) (D) Pharangeal pumping rate. Mean number of contractions per minute was plotted (n = 10 per group). (E) Total brood size of N2 wild type, *jmjd-3.1* null or *jmjd-3.1* over-expressing worms. At least 20 worms were used per genotype. (F) *hsf-1* expression in WT, *jmjd-3.1* null and *jmjd-3.1 o/e* worms at day 1 and day 2 of adulthood. (G and H) Expression of H3K27me3 demethylases in *jmjd-3.1* null or over-expressing animals at (G) day 1 or (H) day 2 (28 hours post L4) of adulthood. (I) Expression levels of *jmjd-3.1* in wild type (N2), *odr-1::RFP* (co-injection marker alone), two independent integrated *jmjd-3.1::mCherry* o/e lines (AM1110 and AM1111) and two independent integrated *jmjd-3.1delNLS::mCherry* o/e lines (AM1112 and AM1114) at day 1 of adulthood. (J) Thermorecovery at different days of adulthood of wild type worms and worms over-expressing *jmjd-3.1::mCherry*, *jmjd-3.1delNLS::mCherry* or co-injection marker alone. (K) Lifespan of worms over-expressing *jmjd-3.1::mCherry*, *jmjd-3.1delNLS::mCherry* or co-injection marker alone. Lifespan statistics from all trials (trials 1-5) can be found in Table S1. Statistical comparisons presented in (K) are relative to N2. Values plotted are the mean of at least 4 biological replicates (unless stated in the legend) and error bars represent SEM. Statistical significance was calculated by two-way ANOVA with Bonferroni post analysis comparison (C, D and J), one-way ANOVA with Tukey post analysis comparison (A, B, E and F), Student's *t*-test (G and H) or Log-rank test (K). \*  $p < 0.05$ , \*\*  $p < 0.01$ , \*\*\*  $p < 0.001$ , ns  $p > 0.05$ .

### A Thermotolerance

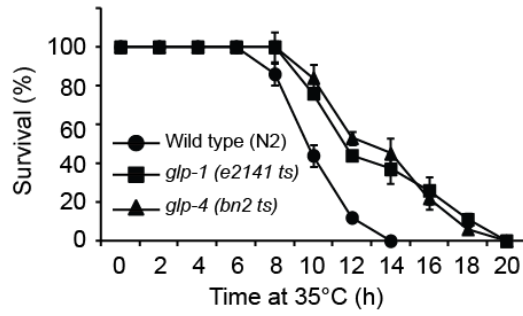

### B

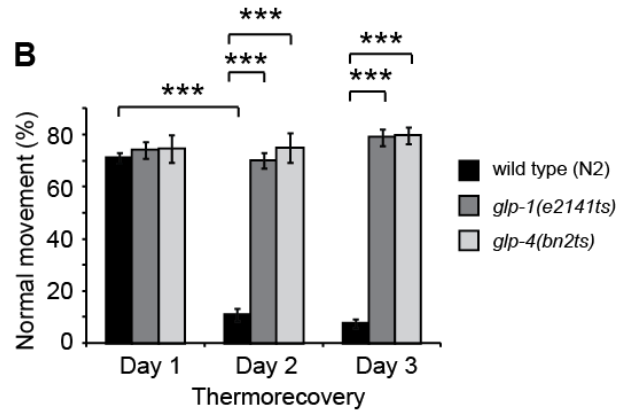

### C

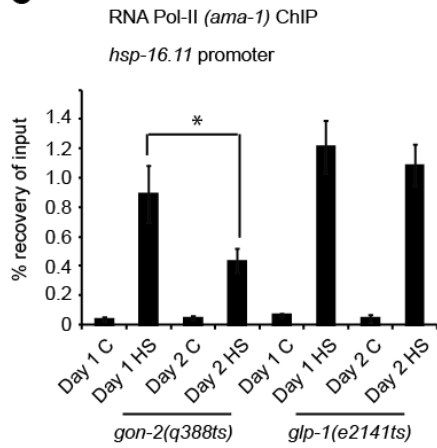

### D

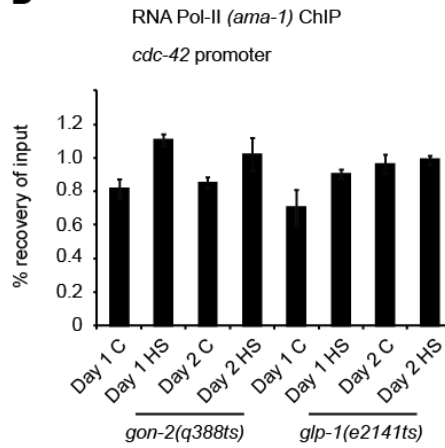

### E

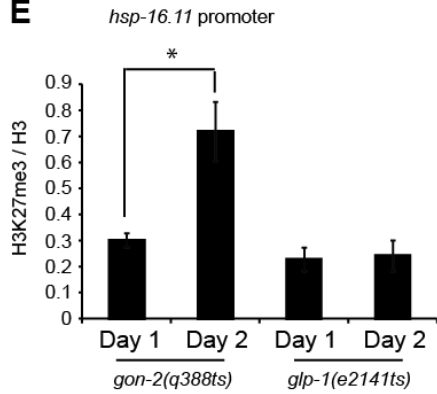

### F

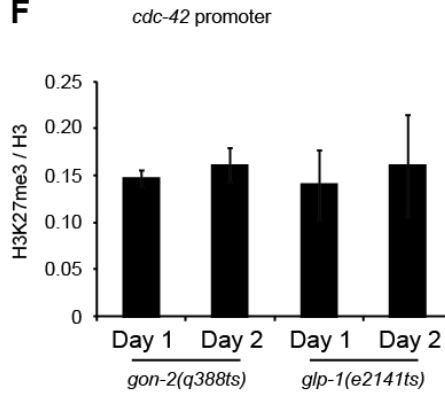

### G

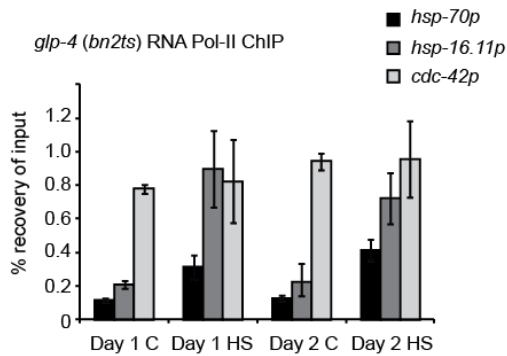

### H

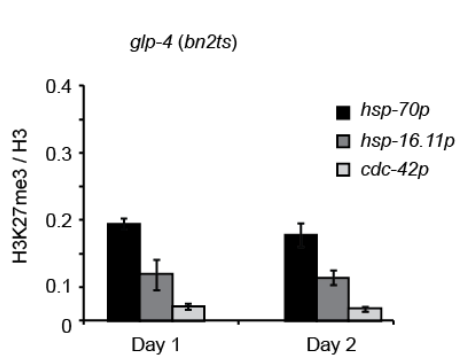

**Figure S6, related to figure 6. Removal of germ line stem cells suppresses H3K27me3 accumulation and restores RNA pol-II occupancy at heat shock promoters following stress.**

(A) Survival of animals at 35°C. N2 wild type (WT) vs *glp-1*,  $p < 0.001$ ; WT vs *glp-4*,  $p < 0.001$ . See Table S2 for complete statistical comparison of groups. (B) Thermorecovery of animals 48 hours post heat shock at 33°C for 6 hours. (C - H) ChIP was performed on chromatin from day 1 or day 2 adult *gon-2(q388ts)*, *glp-1(e2141ts)* or *glp-4(bn2 ts)* worms using antibodies specific for (C, D and G) RNA pol-II (*ama-1*) or (E, F and H) histone H3 and H3K27me3. Levels of H3K27me3 were quantified relative to total histone H3 levels. Values plotted are the mean of at least 3 biological replicates and error bars represent SEM. Statistical significance was calculated using two-way ANOVA with Bonferroni post analysis comparison (A-G) or Student's t-test (H). \*  $p < 0.05$ , \*\*  $p < 0.01$ , \*\*\*  $p < 0.001$ .

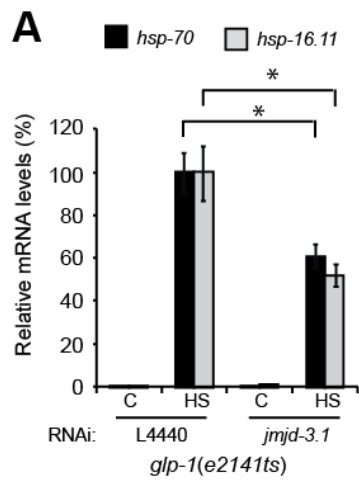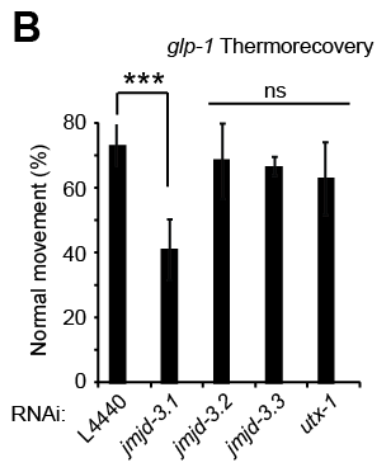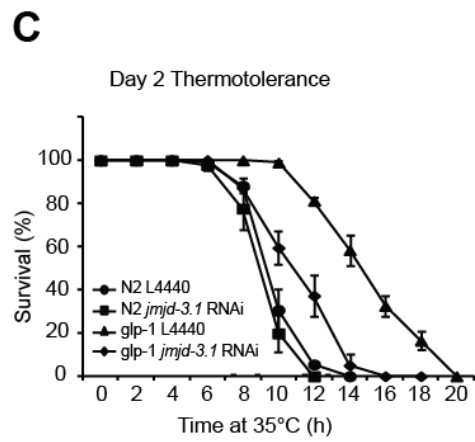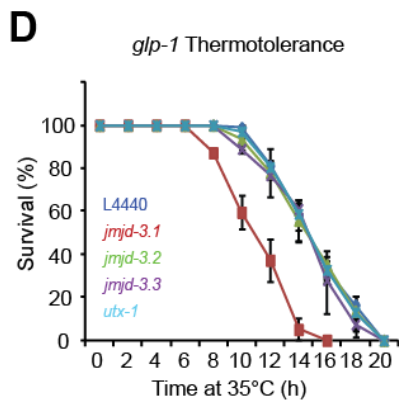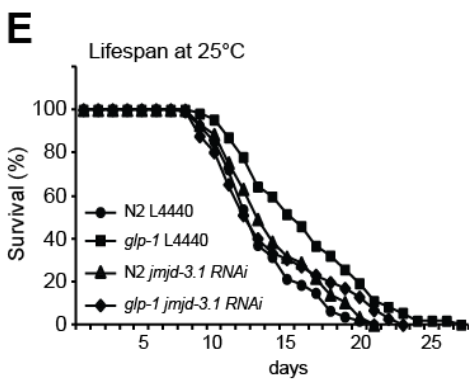

**Figure S7, related to figure 7. *Jmjd-3.1* is necessary for maintenance of the HSR, enhanced stress resistance and increased lifespan of germ line stem cell deficient animals. (A)** Expression of HS genes in *glp-1* animals grown on control (L4440) or *jmjd-3.1* RNAi and exposed to control or heat shock at day 2 of adulthood. **(B)** Thermorecovery of *glp-1* worms at day 2 of adulthood after growth on control (L4440) or H3K27me3 specific RNAi. **(C and D)** Survival of day 2 adults maintained at 35°C. Data are from parallel experiments and for clarity are presented as **(C)** *glp-1* vs N2, L4440 and *jmjd-3.1* only, or **(D)** *glp-1* RNAi only. **(E)** Lifespan analysis of wild type (N2) and *glp-1* mutants grown on L4440 or *jmjd-3.1* RNAi at 25°C. Statistical significance was calculated by Student's *t*-test (A and B), two-way ANOVA (C and D) or Log-rank test (E). \*  $p < 0.05$ , \*\*\*  $p < 0.001$ . For complete statistical comparison of data in panels C-E see Tables S1 and S2.

Supplemental tables

Table S1, related to figures 5 and 7. Statistics associated with lifespan assays.

| <i>Experiment 1</i>               |               |                |                                             |
|-----------------------------------|---------------|----------------|---------------------------------------------|
| Treatment group (n)               | Mean lifespan | Standard error | LOG-RANK <i>p</i> -value (to N2)            |
| N2 (77)                           | 17.08         | 0.37           | n/a                                         |
| <i>jmjd-3.1 gk384</i> (85)        | 17.11         | 0.32           | 0.78                                        |
| <i>jmjd-3.1 o/e</i> (65)          | 19.36         | 0.50           | 0.0006                                      |
| <i>Experiment 2</i>               |               |                |                                             |
| Treatment group (n)               | Mean lifespan | Standard error | LOG-RANK <i>p</i> -value (to N2)            |
| N2 (87)                           | 15.94         | 0.41           | n/a                                         |
| <i>jmjd-3.1 gk384</i> (93)        | 16.01         | 0.40           | 0.965                                       |
| <i>jmjd-3.1 o/e</i> (90)          | 17.76         | 0.52           | 0.0045                                      |
| <i>Experiment 1</i>               |               |                |                                             |
| Treatment group (n)               | Mean lifespan | Standard error | LOG-RANK <i>p</i> -value (to <i>glp-1</i> ) |
| N2 (62)                           | 12.67         | 0.35           | < 0.0001                                    |
| <i>glp-1</i> (70)                 | 15.61         | 0.46           | n/a                                         |
| <i>glp-1;jmjd-3.1</i> (69)        | 14.20         | 0.28           | 0.0001                                      |
| <i>Experiment 2</i>               |               |                |                                             |
| Treatment group (n)               | Mean lifespan | Standard error | LOG-RANK <i>p</i> -value (to <i>glp-1</i> ) |
| N2 (80)                           | 12.15         | 0.31           | < 0.0001                                    |
| <i>glp-1</i> (65)                 | 16.2          | 0.52           | n/a                                         |
| <i>glp-1;jmjd-3.1 o/e</i><br>(74) | 14.20         | 0.48           | 0.0001                                      |
| <i>Experiment 1</i>               |               |                |                                             |
| Treatment group (n)               | Mean lifespan | Standard error | LOG-RANK <i>p</i> -value (to N2 L4440)      |
| N2 L4440 (119)                    | 12.97         | 0.27           | n/a                                         |
| N2 <i>jmjd-3.1</i> (101)          | 13.94         | 0.32           | 0.015                                       |
| <i>glp-1</i> L4440 (54)           | 17            | 0.57           | > 0.0001                                    |
| <i>glp-1 jmjd-3.1</i> (64)        | 13.92         | 0.48           | 0.007                                       |
| <i>Experiment 2</i>               |               |                |                                             |
| Treatment group (n)               | Mean lifespan | Standard error | LOG-RANK <i>p</i> -value (to N2 L4440)      |
| N2 L4440 (127)                    | 13.5          | 0.3            | n/a                                         |
| N2 <i>jmjd-3.1</i> (115)          | 14.05         | 0.29           | 0.568                                       |
| <i>glp-1</i> L4440 (54)           | 18.17         | 0.78           | > 0.0001                                    |
| <i>glp-1 jmjd-3.1</i> (66)        | 14.76         | 0.64           | 0.003                                       |
| <i>Experiment 3</i>               |               |                |                                             |
| Treatment group (n)               | Mean lifespan | Standard error | LOG-RANK <i>p</i> -value (to N2 L4440)      |
| N2 L4440 (108)                    | 13.38         | 0.29           | n/a                                         |
| N2 <i>jmjd-3.1</i> (114)          | 14.18         | 0.32           | 0.05                                        |
| <i>glp-1</i> L4440 (109)          | 16.24         | 0.4            | > 0.0001                                    |

|                                  |                      |                       |                                              |
|----------------------------------|----------------------|-----------------------|----------------------------------------------|
| glp-1 <i>jmjd-3.1</i> (147)      | 13.97                | 0.34                  | 0.05                                         |
| <b>Experiment 4</b>              |                      |                       |                                              |
| <b>Treatment group (n)</b>       | <b>Mean lifespan</b> | <b>Standard error</b> | <b>LOG-RANK <i>p</i>-value (to N2 L4440)</b> |
| N2 L4440 (88)                    | 14.23                | 0.33                  | n/a                                          |
| N2 <i>jmjd-3.1</i> (113)         | 14.65                | 0.33                  | 0.17                                         |
| glp-1 L4440 (119)                | 18.5                 | 0.43                  | > 0.0001                                     |
| glp-1 <i>jmjd-3.1</i> (124)      | 15.28                | 0.48                  | 0.002                                        |
| <b>Experiment 1</b>              |                      |                       |                                              |
| <b>Treatment group (n)</b>       | <b>Mean lifespan</b> | <b>Standard error</b> | <b>LOG-RANK <i>p</i>-value (to N2)</b>       |
| N2 (94)                          | 16.8                 | 0.46                  | n/a                                          |
| <i>jmjd-3.1</i> o/e line 1(63)   | 20.7                 | 0.68                  | < 0.0001                                     |
| <i>jmjd-3.1</i> o/e line 2 (64)  | 20.5                 | 0.89                  | <0.0001                                      |
| <i>odr-1::RFP</i> (65)           | 16.8                 | 0.55                  | 0.8553                                       |
| <b>Experiment 2</b>              |                      |                       |                                              |
| <b>Treatment group (n)</b>       | <b>Mean lifespan</b> | <b>Standard error</b> | <b>LOG-RANK <i>p</i>-value (to N2)</b>       |
| N2 (45)                          | 17.8                 | 0.53                  | n/a                                          |
| <i>jmjd-3.1</i> o/e line 1(43)   | 20.6                 | 0.66                  | 0.0071                                       |
| <i>jmjd-3.1</i> o/e line 2 (45)  | 20.6                 | 0.63                  | 0.0056                                       |
| <i>odr-1::RFP</i> (49)           | 17.7                 | 0.47                  | 0.767                                        |
| <b>Experiment 3</b>              |                      |                       |                                              |
| <b>Treatment group (n)</b>       | <b>Mean lifespan</b> | <b>Standard error</b> | <b>LOG-RANK <i>p</i>-value (to N2)</b>       |
| N2 (56)                          | 18.2                 | 0.59                  | n/a                                          |
| <i>jmjd-3.1</i> ΔNLS line 1 (51) | 18.5                 | 0.55                  | 0.676                                        |
| <i>jmjd-3.1</i> ΔNLS line 2 (54) | 18.3                 | 0.45                  | 0.964                                        |
| <i>odr-1::RFP</i> (48)           | 17.7                 | 0.55                  | 0.658                                        |
| <b>Experiment 4</b>              |                      |                       |                                              |
| <b>Treatment group (n)</b>       | <b>Mean lifespan</b> | <b>Standard error</b> | <b>LOG-RANK <i>p</i>-value (to N2)</b>       |
| N2 (57)                          | 17.54                | 0.74                  | n/a                                          |
| <i>jmjd-3.1</i> ΔNLS line 1 (56) | 18.33                | 0.80                  | 0.462                                        |
| <i>jmjd-3.1</i> ΔNLS line 2 (56) | 18.56                | 0.74                  | 0.444                                        |
| <i>odr-1::RFP</i> (60)           | 18.15                | 0.62                  | 0.454                                        |
| <b>Experiment 5</b>              |                      |                       |                                              |
| <b>Treatment group (n)</b>       | <b>Mean lifespan</b> | <b>Standard error</b> | <b>LOG-RANK <i>p</i>-value (to N2)</b>       |
| N2 (56)                          | 17.4                 | 0.69                  | n/a                                          |
| <i>jmjd-3.1</i> ΔNLS line 1 (61) | 17.6                 | 0.56                  | 0.89                                         |
| <i>jmjd-3.1</i> ΔNLS line 2 (50) | 17.6                 | 0.67                  | 0.73                                         |
| <i>jmjd-3.1</i> o/e line 1(54)   | 19.6                 | 0.79                  | 0.012                                        |
| <i>jmjd-3.1</i> o/e line 2 (60)  | 19.5                 | 0.69                  | 0.006                                        |



**Table S2, related to figures 5 and 7.** Additional statistical comparisons from thermotolerance assays. *P*-values were calculated by two-way ANOVA with Bonferroni post analysis comparison of groups.

| <b><i>Thermotolerance (Figure 5C)</i></b>  |                                       |                       |
|--------------------------------------------|---------------------------------------|-----------------------|
| <b>Genotype</b>                            | <b>vs genotype</b>                    | <b><i>p</i>-value</b> |
| N2 wild type, day 1                        | N2 wild type, day 2                   | 0.01                  |
| N2 wild type, day 1                        | <i>jmjd-3.1(gk384)</i> , day 1        | 0.01                  |
| N2 wild type, day 1                        | <i>jmjd-3.1(gk384)</i> , day 2        | < 0.001               |
| N2 wild type, day 1                        | <i>jmjd-3.1 oe</i> , day 1            | > 0.05                |
| N2 wild type, day 1                        | <i>jmjd-3.1 oe</i> , day 2            | > 0.05                |
| N2 wild type, day 2                        | <i>jmjd-3.1(gk384)</i> , day 1        | > 0.05                |
| N2 wild type, day 2                        | <i>jmjd-3.1(gk384)</i> , day 2        | > 0.05                |
| N2 wild type, day 2                        | <i>jmjd-3.1oe</i> , day 1             | 0.009                 |
| N2 wild type, day 2                        | <i>jmjd-3.1oe</i> , day 2             | 0.002                 |
| <i>jmjd-3.1(gk384)</i> , day 1             | <i>jmjd-3.1(gk384)</i> , day 2        | > 0.05                |
| <i>jmjd-3.1(gk384)</i> , day 1             | <i>jmjd-3.1oe</i> , day 1             | < 0.001               |
| <i>jmjd-3.1(gk384)</i> , day 1             | <i>jmjd-3.1oe</i> , day 2             | < 0.001               |
| <i>jmjd-3.1(gk384)</i> , day 2             | <i>jmjd-3.1oe</i> , day 1             | < 0.001               |
| <i>jmjd-3.1(gk384)</i> , day 2             | <i>jmjd-3.1oe</i> , day 2             | 0.002                 |
| <i>jmjd-3.1oe</i> , day 1                  | <i>jmjd-3.1oe</i> , day 2             | > 0.05                |
| <b><i>Thermotolerance (Figure 7D)</i></b>  |                                       |                       |
| <b>Genotype</b>                            | <b>vs genotype</b>                    | <b><i>p</i>-value</b> |
| N2 wild type                               | <i>glp-1(e2141ts)</i>                 | < 0.0001              |
| N2 wild type                               | <i>glp-1(e2141ts);jmjd-3.1(gk384)</i> | 0.08                  |
| <i>glp-1(e2141ts)</i>                      | <i>glp-1(e2141ts);jmjd-3.1(gk384)</i> | 0.001                 |
| <b><i>Thermotolerance (Figure S6A)</i></b> |                                       |                       |
| <b>Genotype</b>                            | <b>vs genotype</b>                    | <b><i>p</i>-value</b> |
| N2 wild type                               | <i>glp-1(e2141ts)</i>                 | < 0.0001              |
| N2 wild type                               | <i>glp-4(bn2ts)</i>                   | < 0.0001              |
| <i>glp-1(e2141ts)</i>                      | <i>glp-4(bn2ts)</i>                   | > 0.05                |

Table S2. cont.

| <i>Thermotolerance (Figure S7C)</i> |                              |                |
|-------------------------------------|------------------------------|----------------|
| <b>genotype, RNAi</b>               | <b>vs genotype, RNAi</b>     | <b>p-value</b> |
| N2 L4440                            | <i>glp-1</i> L4440           | < 0.001        |
| N2 L4440                            | N2 <i>jmjd-3.1</i>           | > 0.05         |
| N2 L4440                            | <i>glp-1 jmjd-3.1</i>        | < 0.001        |
| <i>glp-1</i> L4440                  | N2 <i>jmjd-3.1</i>           | < 0.001        |
| <i>glp-1</i> L4440                  | <i>glp-1 jmjd-3.1</i>        | < 0.001        |
| N2 <i>jmjd-3.1</i>                  | <i>glp-1 jmjd-3.1</i>        | < 0.001        |
| <i>Thermotolerance (Figure S7D)</i> |                              |                |
| <b><i>glp-1(e2141ts)</i>, RNAi</b>  | <b>vs <i>glp-1</i>, RNAi</b> | <b>p-value</b> |
| L4440                               | <i>jmjd-3.1</i>              | < 0.001        |
| L4440                               | <i>jmjd-3.2</i>              | > 0.05         |
| L4440                               | <i>jmjd-3.3</i>              | > 0.05         |
| L4440                               | <i>utx-1</i>                 | > 0.05         |
| <i>jmjd-3.1</i>                     | <i>jmjd-3.2</i>              | < 0.001        |
| <i>jmjd-3.1</i>                     | <i>jmjd-3.3</i>              | < 0.001        |
| <i>jmjd-3.1</i>                     | <i>utx-1</i>                 | < 0.001        |
| <i>jmjd-3.2</i>                     | <i>jmjd-3.3</i>              | > 0.05         |
| <i>jmjd-3.2</i>                     | <i>utx-1</i>                 | > 0.05         |
| <i>jmjd-3.3</i>                     | <i>utx-1</i>                 | > 0.05         |

**Table S3, related to all main figures.** Primers and probes used in this study

| <b>Target</b>                | <b>Forward</b>                                                   | <b>Reverse</b>                                |
|------------------------------|------------------------------------------------------------------|-----------------------------------------------|
| <i>C12C8.1</i>               | CTACATGCAAAGCGATTGGA                                             | GGCGTAGTCTTGTTCCTTC                           |
| <i>hsp-16.11</i>             | GGCTCAGATGGAACGTCAA                                              | GCTTGAAGTGCAGACATTG                           |
| <i>F44E5.4</i>               | TGATACCCATCTCGGAGGAG                                             | GTGGATTGGGTGAAATGTCC                          |
| <i>hsp-4</i>                 | GGGGACAATCATTGGTATCG                                             | ACGCAACGTATGATGGAGTG                          |
| <i>hsp-3</i>                 | GAACCATCGCTGGATTGAAC                                             | CCTCCAAGATCGAAGACGAG                          |
| <i>hsp-6</i>                 | GTTATCGAGAACGCAGAAGGAG                                           | CATCCTTAGTAGCTTGACGCTG                        |
| <i>hsp-60</i>                | CATGCTCGTCGGAGTCAAC                                              | TTTGTGATCTTTGGGCTTCC                          |
| <i>gcs-1</i>                 | GTGCAAGTGTGACGATCGTAC                                            | GCGAATATGTTTTGCCAGTGGCTC                      |
| <i>gst-4</i>                 | CCGTTTTCTATGGAAGTGACG                                            | GCCCAAGTCAATGAGTCTCC                          |
| <i>mtl-1</i>                 | TGCAAGTGTGACTGCAAAAA                                             | TTTTTCTCACTGGCCTCCTC                          |
| <i>jmjd-3.1</i>              | ACGCCTGATGTTCTCATTGCA                                            | TATGCTGCACAGGCACAGTTTC                        |
| <i>jmjd-3.2</i>              | ATGCCTGGGCTGTCTTCGATTT                                           | AATGCGGAAGGATTGCGTAGGA                        |
| <i>jmjd-3.3</i>              | CGACCGAACGTATCCACTCACCTC                                         | CGCCCGCTTCTTTGCCATTT                          |
| <i>utx-1</i>                 | TTCGGGTTAGGTCTTGTCTACTTG                                         | TCATCATTATTCTCGTGGCTCAG                       |
| <i>hsf-1</i>                 | TGTACAAGGACGTCCCGAAT                                             | TCCAAATTTTGTGCGTCTG                           |
| <i>cdc-42</i>                | GGTTGCTCCAGCTTCATTC                                              | AACAAGAATGGGGTCTTTGA                          |
| <i>rpb-2</i>                 | AACTGGTATTGTGGATCAGGTG                                           | TTTGACCGTGTCGAGATGC                           |
| HSE probe                    | TAAATTGTAGAAGGTTCTAGAAGATGCC<br>AGA                              | TCTGGCATCTTCTAGAACCTTCTACAAT<br>TTA           |
| Mutant probe                 | TAAATTGTAA <u>AA</u> GGAA <u>AA</u> TAA <u>AA</u> AGATGCC<br>AGA | TCTGGCATCTTTT <u>ATTTT</u> CCTTTTACAAT<br>TTA |
| <i>hsp-70</i> TSS<br>-50bp   | AACTCAAATCTTATGCAGAAT                                            | CGTAGTACCCAAGTCGATTCCA                        |
| <i>hsp-70</i> TSS<br>+0bp    | ACGTAATCATGTGTCGGTAT                                             | TCTTCTCCAGTTTACATAATCCT                       |
| <i>hsp-70</i><br>TSS+60bp    | ACGTAATCATGTGTCGGTAT                                             | TCTTCTCCAGTTTACATAATCCT                       |
| <i>hsp-70</i> TSS<br>+120bp  | TTCCGTTTTTCAGGTTGAAATCCTC                                        | TAAAAGCCACGTAGGAAGGCG                         |
| <i>hsp-70</i> TSS<br>+1Kb    | GCCGTTGAAAAGGCACTTC                                              | TACGAGTTGATCCCCCAACC                          |
| <i>hsp-16.11</i><br>promoter | CTGAATGTGAGTCGCCCTCC                                             | GAGAGCCTCTGCAAAGTGGG                          |
| <i>cdc-42</i><br>promoter    | ATGGTAAAGAAACGCTCGTG                                             | TGAAAAATACGGATGAGTCACA                        |
| <i>hsp-4</i><br>promoter     | CGAAAAGTCTCGATTTCTCCA                                            | ACACGTCGCAAAGAAGGAGT                          |
| <i>gcs-1</i><br>promoter     | GCCTTCAGGAGAGATGTAGAGAC                                          | AATGCGAGCGTTTTTCCCAT                          |
| <i>hsp-6</i><br>promoter     | GGGCGTAACTGCAATGTGTG                                             | TCACGGGCTTTTGCATCAAC                          |
| <i>C12C8.1</i><br>promoter   | ATAGCATAGGCGACCCACAG                                             | ACGTTCTCTGGCATCTTCT                           |

**Table S4, related to figures 3, 4, 6 and 7. Antibodies used in this study**

| <b>Target</b>   | <b>Supplier / Catalogue no.</b> |
|-----------------|---------------------------------|
| Pan H3          | Abcam ab1791                    |
| Pan H4          | Abcam ab10158                   |
| H3K4me3         | Millipore 07-473                |
| H3K27me3        | Millipore 07-449                |
| H3K9me3         | Millipore 07-442                |
| H4K8ac          | Abcam ab15823                   |
| H4K16ac         | Millipore 07-329                |
| H4 tetra acetyl | Millipore 06-866                |
| Tubulin         | Sigma T5168                     |
| Hsp-16          | Lithgow lab                     |

## Supplemental experimental procedures

### *Worm maintenance*

Worm strains used in this study were: CF1903 *glp-1 (e2141ts)*, CF2253 *gon-2 (q388ts)*, JK560 *fog-1(q253ts)*, JK816 *fem-3 (q20gf)*, VC936 *jmjd-3.1 (gk384)*, AM726 *rmIs291[hsp-70p::mCherry::pmyo-2::CFP]*, OG497 *unc-119(ed3);drSi13[hsf-1p::hsf-1::GFP::unc-54utr;Cb-unc-119+]*, AM1060 *rmSi1[hsf-1p::hsf-1::GFP::hsf-1utr]*, AM1063 *unc-119(ed9)III, rmSi1 II; ltIs37 [pie-1p::mCherry::his-58 (pAA64) + unc-119(+)]* and AM1107 *Ex355[jmjd-3.1p::jmjd-3.1::mCherry ; odr-1::RFP]*, AM1110 *rmIs370[jmjd-3.1p::jmjd-3.1::mCherry ; odr-1::dsRed]*, AM1111 *rmIs371[jmjd-3.1p::jmjd-3.1::mCherry ; odr-1::dsRed]*, AM1112 *rmIs372[jmjd-3.1p::jmjd-3.1delNLS::mCherry ; myo-2::mCherry]* and AM1114 *rmIs374[jmjd-3.1p::jmjd-3.1delNLS::mCherry ; myo-2::mCherry]*.

### *Chromatin immunoprecipitation*

ChIP was performed as previously described (Mukhopadhyay et al., 2008) with slight modifications. Cross-linking was achieved by gently douncing 15 -20,000 worms (grown on solid NGM plates) for 30 minutes in 2% formaldehyde at room temperature. Worms were washed 3 times in 1 x PBS before being re-suspended in lysis buffer. Worms were dounced vigorously on ice and briefly sonicated on high power (30s “on”, 1 min “off”) using a Bioruptor sonicator until all carcasses were completely destroyed (as determined under a light microscope). Extracts were sonicated as above to yield 500bp – 1kb size DNA fragments (as determined by agarose gel electrophoresis). For pulldowns, chromatin (2 µg DNA) was incubated with 25 µl of protein g-dynabeads (pre-blocked with salmon sperm DNA and bovine serum albumin) and 2 µg of antibody at 4°C with rotation over night. After low to high salt washes, DNA was eluted from

beads by agitation at 65°C in 1% SDS and 0.1 M sodium bicarbonate for 1 hour. Cross linking was reversed by incubation at 65°C with 0.2 M NaCl overnight and DNA was recovered using Qiagen PCR purification kit as per manufacturer's instructions. Strain OG497 was used for HSF-1 ChIP to minimize signal from the germ line (Morton and Lamitina, 2013; Tatum et al., 2015). A complete list of primers and antibodies used in these experiments can be found in supplementary tables 1 and 2.

### ***DNase I digestion assay***

DNase I digestion assays were performed as previously described with some modifications (Dorschner et al., 2004). *C. elegans* were dounced vigorously on ice in Buffer A to release nuclei which were then washed and incubated with 200U of DNase I (Thermoscientific) for 10 minutes at 37°C in nuclease digestion buffer. Digested DNA was prepared for qPCR by standard phenol/chloroform ethanol precipitation. Real time quantitative PCR was used to quantify the digestion of genomic regions of interest in DNase treated versus untreated samples. The amount of DNA remaining following DNase digestion was compared to the starting amount (undigested) in order to calculate the relative amount of digestion that had taken place in each sample. The relative amount of digestion at genomic regions in chromatin from day 2 animals relative to day 1 adults was calculated and plotted in order to provide a less counter-intuitive view of the data.

### ***Protein extraction and western blotting***

Standard methods for western blotting were used for the detection of HSP-16 and tubulin. Briefly, 100 worms were collected in 20 µl of lysis buffer [50 mM Tris pH 7.4, 5 mM MgCl<sub>2</sub>, 2% Triton X-100, 0.2 mM PMSF, 1 µg/µl Leupeptin, protease inhibitor tablet] and freeze thawed three times. Worms were then sonicated twice on high power for 15 minutes total (30s on, 1 min off) using a Bioruptor sonicator and cell debris was removed by centrifugation. 5 µg of protein

lysate in Laemmli loading buffer was separated by SDS-PAGE and transferred to nitrocellulose membranes. Blots were blocked for 1 hour with 5% milk in PBS and probed using anti HSP-16 (1:1000; overnight at 4°C) or anti tubulin primary antibodies (1:5000; 1 hour at room temperature). Promega anti mouse (W4021) and anti rabbit (W4011) HRP conjugated secondary antibodies were used at 1:5000 dilution for 1 hour at room temperature. Proteins were detected using ECL plus reagent (Perkin Elmer) and signal was captured using a Syngene PXi imager and Genesys software.
